# Supplementary material for: The MEK-ERK-MST1 Axis Potentiates the Activation of the Extrinsic Apoptotic Pathway during GDC-0941 Treatment in Jurkat T Cells
Source: MDPI journal article supplement (doi:10.3390/cells8020191), 2019-02-21
Supplement: s1 [file s1]

| Protein | Peptide Sequence    | Control<br>(Total Area) | GDC-0941<br>(Total Area) | GDC/CTRL<br>Ratio |
|---------|---------------------|-------------------------|--------------------------|-------------------|
| NEK2    | SDGGHTVLHR          | 23996                   | 1948381                  | 81                |
| NEK2    | ILNHDTSEFAK         | 286600                  | 28686594                 | 101               |
| NEK2    | YSDELNEIITR         | 902326                  | 75235560                 | 83                |
| PLK1    | AGVPGVAAPGAPAAAPPAK | 2133964                 | 51946708                 | 24                |
| PLK1    | SLLKPHQR            | 779849                  | 18754126                 | 24                |
| PLK1    | LILYNDGDSLQYIER     | 1833385                 | 57238208                 | 31                |

**Figure 1S.** Quantification of NEK2- and PLK1-specific peptides co-precipitated with MST1 protein in control and GDC-0941 treated cells. Individual peptides were identified and quantified in trypsin-digested mixture of proteins which were co-precipitated with MST1 protein using LC-MS/MS analysis.
